# Supplementary material
Source: Research Square preprint supplement (doi:10.21203/rs.3.rs-9539802/v1)
Supplement: Supplementary file 1 [file 4bd1b3f81c6522bd2901cf47.xlsx]

## Sheet: Metadata
trueID	Species	Breed	Departement	Pack	City	Cause of death	Origin	N° cadaver (BDD)	Capture date	N° SAGIR	Bodymass	Age based on head	DIGpds	DIGlg	DIGlgfibre	DIGangle	DIGpcsa	MASSUPpds	MASSUPlg	MASSUPlgfibre	MASSUPangle	MASSUPpcsa	MASPROFpds	MASPROFlg	MASPROFlgfibre	MASPROFangle	MASPROFpcsa	ZYGANTpds	ZYGANTlg	ZYGANTlgfibre	ZYGANTangle	ZYGANTpcsa	ZYGPOSTpds	ZYGPOSTlg	ZYGPOSTlgfibre	ZYGPOSTangle	ZYGPOSTpcsa	SPZYGpds	SPZYGlg	SPZYGlgfibre	SPZYGangle	SPZYGpcsa	TPSUPpds	TPSUPlg	TPSUPlgfibre	TPSUPangle	TPSUPpcsa	TPPROFpds	TPPROFlg
101M	WOLF		06	THIEY CAUSSOLS	ST VALLIER DE THIEY	regulated shooting	ONCFS Gières - Grand Congel Bureau Louise	D0619002	43500	S 14 31 37	37	adult	26.05	78	78	0	3.13614	48.05	80	24	40	14.322	12.79	40	20	30	5.18041	14.61	60	35	10	3.87296	7.31	50	13	40	4.03677	20.32	120	55	0	3.47092	78.85	140	48	30	13.2805	111.38	140
102M	WOLF		04	VANSON	SISTERON	natural death	OFB Gap	D0418003	43197	S 13 56 70		adult	25.62	108	108	0	2.2276	44.22	96	25	17	15.7959	19	61	27	20	6.18542	16	60	32	5	4.69271	9.99	55	13	33	6.03977	15.17	111	48	17	2.83938	68.57	154	36	20	16.7086	92.3	131
103F	WOLF		83	MONT AURELIEN	POURCIEUX	car crash	Labo véto GAP	D8319004	43713	S 14 35 55	20	adult	14.47	107	107	0	1.26989	21.38	79	21	42	7.0653	9.91	52	15	28	5.45646	7.69	56	23	15	3.04265	4.47	48	13	30	2.79062	10.33	117	44	9	2.17847	39.45	119	37	37	7.94909	43.65	117
104M	WOLF		04	MONGES	AUZET	regulated shooting	OFB Gap	D0420013	44089	S 13 51 38		adult	25	93	93	0	2.52429	46.56	100	24.5	50	11.4073	14.85	50	20	33	5.8248	19.38	65	35	20	4.90208	10	55	12	30	6.76326	16.98	135	45	15	3.42415	73.37	155	42	32	13.8297	109.3	135
105F	WOLF		05	CHABRIERES	ANCELLE	regulated shooting	ONCFS Gières - Grand Congel Bureau Louise	D0520012	44080	S 13 99 05		adult	20	115	100	0	1.87807	37.08	105	25	25	12.5529	17	55	20	15	7.67991	15.15	50	35	25	3.69598	14.12	60	15	30	7.63978	11.37	120	35	20	2.86788	47.65	145	40	20	10.4499	88.56	140
106F	WOLF		06	AUDIBERGUE	ESCRAGNOLLES	regulated shooting	Clermont-Ferrand	D0618006	43358	S 24 31 01	23	adult	24.08	117	117	0	1.93265	36.72	88	28	50	7.87192	15.27	57	27	5	5.27003	16.19	77	37	7	4.09171	10.26	55	11	30	7.56993	15.84	133	40	8	3.6841	59.65	124	43	19	12.2443	73.78	119
107M	WOLF		26	LA RAYE	COMBOVIN	regulated shooting	ONCFS Gières - Grand Congel Bureau Louise	D2619006	43694	S 13 94 33	36	adult	28.66	120	110	0	2.44661	52.33	100	30	30	14.1068	17.26	60	20	20	7.5856	12.49	45	35	30	2.91162	13.33	55	10	15	12.0665	19.54	130	35	30	4.54225	58.91	145	40	15	13.28	101.75	145
108F	WOLF		06	CHEIRON	COURSEGOULES	regulated shooting	ONCFS Gières - Grand Congel Bureau Louise	D0619019	43585	S 13 86 13	20	adult	16.37	107	107	0	1.43664	27.68	76	24	40	8.25044	9.67	57	16	30	4.89588	11.55	59	32	20	3.19541	5.79	47	12	27	4.02888	9.36	107	44	10	1.96815	40.95	125	38	21	9.39173	66.82	126
109F	WOLF		06	HAUTE TINEE	ISOLA	NA	Labo véto GAP	D0618010		S 13 90 00		adult	25.11	124	124	0	1.90155	42.65	96	29	37	10.9683	14.5	57	28	15	4.67894	14.05	65	44	11	2.95311	11.31	62	12	43	6.45974	15.52	117	43	5	3.37793	54.02	143	51	22	9.16799	80.82	132
10ND	WOLF		73	BELLEDONNE NORD	ST ALBAN DES HURTIERES	regulated shooting	Clermont-Ferrand	D7320014	42601	S 13 40 28		adult	32.96	127	127	0	2.43705	52.96	109	32	32	13.1065	25.07	64	27	21	8.10841	24.42	74	36	7	6.34312	14.47	65	15	28	7.98213	25.02	132	47	22	4.63702	84.6	143	44	22	16.6421	118.92	139
110F	WOLF		06	COULOMP DALUIS	LA CROIX SUR ROUDOULE	regulated shooting	Vizilles	D0619001	43478	S 12 96 81	25	adult	18.45	116	116	0	1.49355	35.09	95	24	20	12.83	9.18	41	16	31	4.60025	15.58	67	51	3	2.87416	7.65	55	13	30	4.7759	13.98	107	48	3	2.73246	46.05	127	41	23	9.65152	84.4	133
111F	WOLF		83	ESPIGUIERES	FOX AMPHOUX	regulated shooting	OFB Gap	D8319010		S 13 61 41	24	adult	20.68	114	114	0	1.70344	28.87	87	19	30	12.2883	10.15	43	8	25	10.7559	12.2	61	28	7	4.07438	7.81	60	10	34	6.06781	10.76	108	40	21	2.35932	44.3	141	29	35	11.6814	82.26	133
113M	WOLF		83	SAINTE CROIX CANJUERS	AIGUINES	regulated shooting	OFB Gap	D8318003	43600	S 13 61 33	34	adult	29.04	72	72	0	3.78744	39.94	95	30	35	10.184	18.34	55	30	28	5.04901	18.67	70	34	15	4.9971	9.9	50	20	25	4.20424	12.9	90	38	20	2.99692	73.67	140	48	40	10.9756	95.6	110
114M	WOLF		73	ENCOMBRES	ST MARTIN DE BELLEVILLE	NA	Labo véto GAP	D7317007	42962	S 13 82 34		subadult	15.72	75	75	0	1.96822	17.77	85	25	28	5.86072	4.59	43	14	30	2.65588	7.09	65	26	15	2.48157	3.82	49	14	26	2.29828	9.3	95	43	10	2.00101	21.41	105	40	34	4.14242	41.64	120
115F	WOLF		83	LES BORNES	LE PETIT BORNAND LES GLIE	regulated shooting	OFB Gap	D8317002	43207	S 13 29 84	24.8	adult	18.39	95	95	0	1.81777	32.67	80	24	45	8.98859	11.68	42	13	47.5	5.67775	14.12	60	27	40	3.77428	7.48	50	10	40	5.36985	12	100	40	30	2.44082	43.1	110	38	45	7.4869	70.67	110
116ND	WOLF		73	GALIBIER THABOR	VALLOIRE	NA	OFB Gap	D7320011	43703	S 13 40 10		adult	25.32	117	115	0	2.06751	47.06	87	22	27	17.7983	15.36	67	9	36	12.9152	14.65	65	32	0	4.31317	12.85	65	8	65	6.36162	15.58	125	83	0	1.76349	66.34	142	42	23	13.573	109.7	121
117M	WOLF		06	PREALPES DE MENTON	PEILLE	regulated shooting	ONCFS Gières - Grand Congel Bureau Louise	D0619013	43601	S 13 86 16	30	adult	25.63	128	128	0	1.88027	43.04	97	23	25	15.8376	11.9	55	14	20	7.47133	13.23	80.02	27	15	4.45912	7.9	52	9	27	7.32946	14.26	107	48	13	2.71948	55.82	148	44	23	10.9015	80.98	130
120F	WOLF		06	AUDIBERGUE	SERANON	regulated shooting	Clermont-Ferrand	D0618007	43359	S 13 89 99	26	adult	21.35	104	104	0	1.92773	33.6	92	29	39	8.40838	12.21	48	21	18	5.17245	16.34	72	30	10	5.05349	8.4	57	13	47	4.12977	10.52	114	52	5	1.89339	47.3	128	44	33	8.41634	74.79	127
121M	WOLF		04	VANSON	SISTERON	car crash	Labo véto GAP	D0419003	43522	S 13 56 55		adult	24.02	102	102	0	2.21134	51.48	115	35	40	10.5219	16.85	56	17	25	8.40272	18.53	80	36	12	4.74336	12.29	75	20	30	4.98723	20.54	125	46	11	4.11787	66.94	175	47	31	11.3966	112.53	155
122M	WOLF		05	RIPA HAUT GUIL	ABRIES	car crash	Labo véto GAP	D0520017	44127	S 13 51 33		adult	16.13	115	105	0	1.44254	42.53	95	40	30	8.59873	19.8	55	15	25	11.1903	12.36	40	35	10	3.27651	13	65	12	15	9.80646	17.69	125	40	30	3.59817	58.31	160	40	30	11.7852	111.08	150
123M	WOLF		83	CANJUERS EST	COMPS SUR ARTUBY	regulated shooting	OFB Gap	D8319006	43873	S 14 35 58	30	adult	28.5	106	106	0	2.52476	42.56	91	15	21	24.7361	14.23	56	6	40	16.9942	14.62	77	40	0	3.44347	13.33	66	13	32	8.14918	14.27	108	41	0	3.26982	57.43	118	28	23	17.6251	89.06	118
124F	WOLF		38	VERCORS NORD	VEUREY VOROIZE	regulated shooting	Clermont-Ferrand	D3820002	41633	S 14 28 59		adult	17.06	116	116	0	1.38103	28.2	86	16	45	11.6381	10.47	58	14	18	6.65301	12.02	61	35	17	3.09415	6.62	50	11	42	4.19127	11.82	104	37	16	2.88497	44.88	123	40	35	8.57988	69.28	124
125M	WOLF		73	GALIBIER THABOR	VALLOIRE	regulated shooting	Clermont-Ferrand	D7320012	44010	S 13 40 19		adult	26.09	115	90	0	2.72216	46	100	25	30	14.8805	20.39	65	20	20	8.9612	14.8	50	40	0	3.48587	7.66	55	17	10	4.15851	16.4	130	65	15	2.28959	86.09	160	50	20	15.104	88.63	135
126M	WOLF		73	ENCOMBRES	PLANAY	regulated shooting	Clermont-Ferrand	D7319007	43655	S 13 95 39		adult	23.86	75	75	0	2.98738	49.83	90	30	40	11.8821	22.48	56	19	20	10.3997	15.96	80	28	10	5.28854	10	50	10	45	6.62661	14.53	125	28	25	4.41842	68.44	140	35	28	16.1176	109.92	130
127M	WOLF		73	BEAUFORTAIN	LA LECHERE	NA	Labo véto GAP	D7317012	43078	S 12 89 39		adult	26.65	135	135	0	1.85372	50.6	99	24	45	13.9217	14.46	45	19	20	6.6895	17.65	85	26	20	6.00989	9.57	55	14	30	5.5478	15.62	123	47	8	3.09186	71.3	163	41	30	14.0592	118.32	131
128M	WOLF		83	OUEST VAR	LA VERDIERE	regulated shooting	OFB Gap	D8319003	43707	S 14 35 53	29	adult	24.63	112	112	0	2.06504	38.44	90	28	40	9.82082	13.46	56	24	25	4.75448	12.96	65	30	4	4.06007	9.41	54	13	35	5.5567	13.66	118	53	5	2.41214	55.53	136	39	28	11.736	77.82	133
12M	WOLF		73	LAUZIERE	BONVILLARET	regulated shooting	Clermont-Ferrand	D7317006	43028	S 12 89 40	31.4	adult	23.33	114	114	0	1.92173	49.68	99	25	44	13.3489	5.9	74	31	19	1.68327	18.53	62	37	9	4.66018	9.44	58	15	38	4.6475	21.63	119	49	31	3.55475	74.66	156	48	23	13.3658	109.48	136
130M	WOLF		06	VESUBIE ROYA	BREIL SUR ROYA	regulated shooting	ONCFS Gières - Grand Congel Bureau Louise	D0619022	43602	S 14 31 24	30	adult	27.2	124	124	0	2.05982	47.95	97	33	46	9.42572	17.48	57	12	26	12.2465	20.92	83	34	15	5.59933	11.08	60	16	32	5.5036	15.31	125	52	5	2.75549	70.23	135	46	25	12.9171	92.11	134
132ND	WOLF		83	MAURES	LA MOLE	car crash	Labo véto GAP	D8320003	43918	S 13 61 42		adult	29.55	84	84	0	3.30339	40.13	98	20	40	14.3536	15.32	38	28	18	4.86744	18.65	75	32	10	5.40741	10	60	10	35	7.67664	18.51	110	45	12.5	3.77276	77.07	130	32	25	20.3767	101.12	110
133F	WOLF		83	CANJUERS EST	COMPS SUR ARTUBY	regulated shooting	OFB Gap	D8319007	44076	S 13 61 34		adult	21.5	115	100	0	2.01893	35.78	90	15	30	19.2907	9.7	50	15	20	5.68407	10.33	40	25	30	3.37132	5.41	30	8	20	5.95524	12.1	105	40	30	2.46116	58.51	130	35	30	13.515	65.04	110
135F	WOLF		06	LA BERNARDE	GREOLIERES	regulated shooting	ONCFS Gières - Grand Congel Bureau Louise	D0619011	43595	S 13 29 75	26	adult	17.8	115	70	0	2.38783	28.64	85	15	30	15.4412	9.29	55	13	20	6.28133	6.77	35	30	20	1.99785	7.46	50	10	30	6.05447	10.97	110	30	35	2.81406	39.71	140	35	20	9.95271	56.56	120
137F	WOLF		04	AUP	BARREME	car crash	ONCFS Gières - Grand Congel Bureau Louise	D0418014	43423	S 13 56 69		adult	20.65	90	90	0	2.15456	37.68	110	26	50	8.69908	12.43	65	18	30	5.594	16.6	70	25	20	5.87845	10	53	13	35	5.90511	11.7	115	40	10	2.70621	41.24	130	32	35	9.855	88.74	135
139M	WOLF		06	HAUTE TINEE	ISOLA	NA	Labo véto GAP	D0618011	43376	S 13 90 01		adult	24.84	123	123	0	1.89639	42.02	93	30	30	11.3275	15.07	56	19	18	7.05601	19.13	75	35	5	5.1298	10.35	58	13	20	7.01115	14.35	117	58	6	2.31165	64.16	143	42	25	12.9245	88.12	141
13ND	WOLF		73	TROIS VALLEES	LES ALLUES	regulated shooting	Aiton	D7320008	19/08/2020	S 13 40 08		adult	27.52	122	122	0	2.11822	43.04	87	31	22	12.0211	15.28	80	16	22	8.28252	15.25	89	44	0	3.26532	11.32	53	14	23	6.97511	16.58	106	47	10	3.26379	75.74	132	36	37	15.6854	107.53	144
140M	WOLF		06	AUDIBERGUE	ESCRAGNOLLES	regulated shooting	ONCFS Gières - Grand Congel Bureau Louise	D0619007	43541	S 14 31 38	34	adult	25.74	115	130	0	1.85929	37.69	80	30	25	10.6328	18.63	55	12	35	11.8957	8.39	45	35	50	1.45168	13.94	60	10	35	10.7012	18.41	110	45	35	3.1484	58.59	155	45	25	11.0157	79.25	130
141M	WOLF		06	CHEIRON	COURSEGOULES	regulated shooting	ONCFS Gières - Grand Congel Bureau Louise	D0619020	43586	S 13 86 14	27	adult	25.35	118	118	0	2.01733	27.18	83	15	38	13.3339	11.54	52	16	18	6.41631	15.12	67	34	12	4.09814	8.13	49	13	25	5.31165	10.81	98	35	12	2.83822	42.6	145	33	25	10.9218	71.19	125
142F	WOLF		06	THIEY CAUSSOLS	GOURDON	regulated shooting	ONCFS Gières - Grand Congel Bureau Louise	D0619021	43590	S 13 86 15	27	adult	21.56	116	116	0	1.74531	40.45	88	24	35	12.8926	9.87	56	15	20	5.78369	15.81	83	21	34	5.88025	8.04	57	10	32	6.38974	11.75	105	57	5	1.92926	56.25	145	37	22	13.1586	87.5	131
143F	WOLF		73	BEAUFORTAIN	LA LECHERE	NA	Labo véto GAP	D7319017	43717	S 13 94 87		adult	24.88	120	100	0	2.33632	38.48	100	30	25	10.8557	16.93	70	20	15	7.64828	9.31	45	25	10	3.45518	11.76	60	10	30	9.54431	14.4	110	40	20	3.17813	55.82	130	40	30	11.2819	76.44	135
144M	WOLF		73	BEAUFORTAIN	LA LECHERE	NA	Labo véto GAP	D7319018	43729	S 13 94 94		adult	27.15	79	79	0	3.22719	47.78	100	38	38	9.25259	18.76	55	22	25	7.22902	24.4	80	45	40	3.91328	14.77	65	20	35	5.6692	16.58	125	55	30	2.45265	77.66	160	60	30	10.4641	129.52	130
145M	WOLF		83	SAINTE CROIX CANJUERS	AIGUINES	regulated shooting	OFB Gap	D8317003	43387	S 13 61 24		adult	19.72	67	67	0	2.76385	23.26	80	18	38	9.50906	7.73	50	20	28	3.19211	6.1	58	33	30	1.50819	8.53	52	9	45	6.28056	8.88	80	18	35	3.79654	32.46	115	26	38	9.18398	58.2	120
146F	WOLF		83	CANJUERS EST	SEILLANS	regulated shooting	OFB Gap	D8317004	43173	S 13 61 26	15	subadult	11.09	80	80	0	1.30174	11.98	52	17	35	5.39065	1.94	35	22	15	0.796739	2.66	50	20	10	1.23399	6	40	15	50	2.40954	8.77	80	32	15	2.48701	20.11	120	38	35	4.04685	35.23	110
147M	WOLF		83	TRIGANCE	COMPS SUR ARTUBY	regulated shooting	OFB Gap	D8318001	43505	S 13 61 30	30	adult	22.2	115	110	0	1.89514	37.34	90	25	30	12.0791	12.21	45	10	30	9.89099	8.48	45	40	10	1.96696	11.17	50	10	20	9.83661	15.18	115	45	30	2.74456	48.5	130	40	20	10.6363	77.53	125
14M	WOLF		73	TROIS VALLEES	PRALOGNAN LA VANOISE	regulated shooting	Clermont-Ferrand	D7320004	26/07/2020	S 13 56 30	32.5	adult	29.94	87	87	0	3.23158	59	100	27	38	16.0801	17.88	58	20	30	7.24205	9.82	65	35	30	2.2892	9.82	65	13	35	5.79881	18.29	115	35	20	4.61333	88.68	180	46	28	15.8901	113.94	130
15M	WOLF		05	CHABRIERES	ANCELLE	regulated shooting	Clermont-Ferrand	D0520016	44125	S 13 51 41	32	adult	30.36	134	134	0	2.12754	47.85	102	26	33	14.4135	15.39	56	16	25	8.15432	20.9	81	39	0	5.04883	13.44	66	14	12	8.79999	13.57	119	38	5	3.34213	79.33	162	35	24	19.3296	109.29	133
16M	WOLF		04	COULOMP DALUIS	LE FUGERET	regulated shooting	OFB Gap	D0415011	42337	S inconnu		subadult	16.26	114	114	0	1.33936	19.36	83	17	43	7.77772	14.36	77	16	33	7.04075	6.18	56				8.17	70	12	32	5.41088	10.43	102	36	12	2.66238	34.52	119	335	21	0.898052	52.12	118
17M	WOLF		04	MONGES	AUZET	regulated shooting	OFB Gap	D0418007	43368	S 13 56 75		adult	31.15	120	120	0	2.43758	46.2	101	24	24	16.4221	23.33	70	19	32	9.74036	17.19	84	41	0	3.95004	11.83	78	13	44	6.13454	26.43	123	24	29	9.04875	73.93	138	42	27	14.6412	123.17	147
18ND	WOLF		83	SAINTE CROIX CANJUERS	AMPUS	regulated shooting	OFB Gap	D8318007	43707	S 13 29 86		adult	25.44	125	125	0	1.91112	33.84	90	26	40	9.31064	15.76	50	11	31	11.4874	10.52	65	32	20	2.91045	8.75	60	10	35	6.71706	14.07	100	32	15	3.98999	55.33	150	42	45	8.69601	83.16	135
19F	WOLF		83	CANJUERS EST	SEILLANS	regulated shooting	OFB Gap	D8319008	43877	S 13 61 37	25	adult	22.62	116	116	0	1.83112	39.86	91.15	22.53	28	14.5875	14.58	68.39	30.73	20	4.17036	14.23	62.53	34.87	10	3.78629	8.11	45.4	14.08	19	5.10381	17.16	113.92	41.86	30	3.33528	59.67	145.24	41.18	27	12.0524	86.75	135
1F	WOLF		83	SAINTE CROIX CANJUERS	AMPUS	regulated shooting	OFB Gap	D8318005	43600	S 14 35 45	26	adult	26.32	122	122	0	2.02585	39.49	95	20	30	15.9682	15.74	62	25	37.5	4.67223	7.43	61	33	0	2.12121	7.43	63	8	30	7.53765	16.54	116	39	35	3.26377	64.5	171	48	30	10.8636	73.4	129
20F	WOLF		06	TEILLON HAUT ESTERON	ST VALLIER DE THIEY	regulated shooting	ONCFS Gières - Grand Congel Bureau Louise	D0618008	43383	S 13 89 79	25	adult	18.32	110	110	0	1.56392	31.52	84	26	30	9.8042	9.74	42	9	35	8.29229	12.57	51	34	10	3.43018	6.58	48	11	35	4.59202	9.68	97	47	10	1.90552	43.78	128	40	15	9.86923	72.06	123
21F	WOLF		06	PREALPES DE MENTON	PEILLE	regulated shooting	ONCFS Gières - Grand Congel Bureau Louise	D0619018	43581	S 14 31 40	26	adult	14.02	71	71	0	1.85426	24.26	87	25	37.5	7.18929	10.73	55	25	18	3.81821	12.03	70	38	17	2.85225	5.72	50	12	34	3.70336	10.15	100	50	15	1.84214	31.99	110	32	30	8.08199	71.2	132
22M	WOLF		73	BELLEDONNE NORD	ST ALBAN DES HURTIERES	regulated shooting	Clermont-Ferrand	D7319013	43682	S 13 56 39		adult	29.81	92	92	0	3.04268	48.34	90	30	50	9.67211	12.81	52	12	35	8.17948	15.66	65	28	35	4.31626	12.04	60	13	38	6.83946	18.25	135	54	15	3.06688	84.87	180	40	20	18.6125	104.69	135
24F	WOLF		73	GALIBIER THABOR	ORELLE	car crash	Labo véto GAP	D7320002	44022	S 13 40 03	28	adult	26.95	121	121	0	2.09149	46.93	130	27	39	12.6141	14.08	60	19	23	6.3807	11.47	64	36	7	2.97935	10.47	60	12	20	7.68348	18.15	87				59.92	151	34	23	15.1441	102.02	133
26F	WOLF		73	BEAUFORTAIN	LA LECHERE	NA	Labo véto GAP	D7319014	43686	S 12 89 49		adult	20.23	110	110	0	1.72697	33.3	86	23	42	10.0475	13.95	55	13	25	9.09703	9.87	62	22	15	4.0827	7.25	51	7	35	7.9508	14.6	96	39	15	3.39716	52.97	148	36	25	12.4488	69.17	132
28ND	WOLF		73	LAUZIERE	MONTSAPEY	regulated shooting	Clermont-Ferrand	D7320010	08/09/2020	S 13 94 97		adult	26.17	127	127	0	1.935	36.84	91	21	24	14.9658	12.56	71	13	32	7.66408	18	75	45	0	3.76851	9.38	54	11	43	5.84446	10.73	101	31	7	3.22754	69.13	151	40	33	13.5307	82.58	128
2M	WOLF		73	ENCOMBRES	PONTAMAFREY MONTPASCAL	regulated shooting	Clermont-Ferrand	D7318006	43337	S 13 56 47		adult	27.01	119	119	0	2.13137	34.64	92	16	35	16.5612	11.3	59	29	30	3.15649	11.09	58	27	15	3.73784	7.54	54	9	20	7.3777	12.74	104	41	20	2.74318	50.55	160	52	20	8.52761	93.4	146
33ND	WOLF		26	VERCORS OUEST	BOUVANTE	NA	Labo véto GAP	D2620005	44109	S 14 49 41		adult	36.78	135	44	0	7.84948	55	105	25	35	16.8289	18.47	55	25	30	5.98482	12.37	35	30	30	3.36425	15.48	70	15	20	9.08808	19.76	130	45	20	3.87654	92.76	160	45	20	18.0825	117.47	140
37F	WOLF		73	ENCOMBRES	LES ALLUES	regulated shooting	Clermont-Ferrand	D7317002	42949	S 13 82 32	29.5	adult	24.4	120	120	0	1.90937	39.72	95	23	35	13.2104	15.25	67	16	40	6.82963	15	11.81	33	7	4.25047	12.01	58	10	50	7.23464	13.78	103	52	4	2.48353	59.03	135	44	34	10.3829	85.89	128
3F	WOLF		74	LES BORNES	LES VILLARDS SUR THONES	regulated shooting	OFB Gap	D7420001	43031	S 14 30 84	24.2	adult	22.08	113	113	0	1.83486	33.23	82	21	28	13.0471	7.86	55	12	21	5.71987	17.32	68	29	4	5.61306	10.91	66	7	42	10.8544	12.08	108	34	8	3.3054	52.8	153	43	28	10.121	76.93	138
45M	WOLF		05	CHABRIERES	REALLON	NA	Labo véto GAP	D0518009	42612	S 13 51 46		adult	28.82	119	119	0	2.2742	52.46	103.31	23.44	44	15.034	22.58	79.63	28.31	25	6.76166	19.27	68.31	36.05	5	5.01684	12.31	59.77	13.94	25	7.50028	19.58	120.99	49.42	20	3.49767	77.49	131.77	43.48	43	12.1677	106.82	132.67
46M	WOLF		04	PARPAILLON UBAYE	LARCHE	regulated shooting	OFB Gap	D0420010	44089	S 14 52 08		adult	27.98	100	100	0	2.62742	50.6	113	30	48	10.5392	19.41	74	23	27	7.03351	23.39	75	49	10	4.42889	11.62	59	22	38	3.90052	17.23	119	30	6	5.36614	81.35	157	47	21	15.0846	114.1	148
47M	WOLF		06	THIEY CAUSSOLS	ST AUBAN	NA	Labo véto GAP	D0618009	43383	S 13 89 78		adult	31.35	100	100	0	2.94387	48.62	105	30	35	12.3973	19.54	50	20	25	8.28254	15.72	75	46	10	3.1707	10.23	60	17	25	5.11104	17.24	145	48	15	3.25929	86.48	155	50	25	14.6334	104.85	135
48ND	WOLF		26	LA RAYE	GIGORS ET LOZERON	regulated shooting	Clermont-Ferrand	D2620004	44024	S 14 49 39		adult	24.1	77	77	0	2.93906	36.91	98	32	38	8.48779	13.09	43	20	27	5.45486	15.32	80	30	40	3.68554	7.41	60	12	35	4.74032	13.78	118	48	10	2.65609	54.42	145	50	28	8.97113	81.83	120
49M	WOLF		05	MORGON	CROTS	NA	Labo véto GAP	D0518003	43140	S 12 66 30		subadult	20.21	11.5	105	0	1.80742	27.63	90	20	30	11.1725	12.26	55	15	25	6.92896	8.28	40	35	0	2.2288	10.08	55	15	30	5.45389	11.41	110	55	15	1.88257	54.08	160	35	10	14.2051	58	125
50F	WOLF		73	LAUZIERE	MONTSAPEY	regulated shooting	Clermont-Ferrand	D7317005	42974	S 12 89 45	29	adult	26.24	132	132	0	1.86669	39.56	98	24	28	13.5909	14.43	52	21	35	5.26508	14.86	74	50	6	2.78466	10.25	56	15	20	6.01762	15.63	106	31	15	4.57535	56.74	130	43	25	11.164	88.12	129
51M	WOLF		73	BELLECOTE	BOURG ST MAURICE	NA	Labo véto GAP	D7319016	43713	S 13 94 89		adult	24.68	131	121	0	1.91532	42	105	30	35	10.7093	20.09	70	20	25	8.51567	10.75	48	45	0	2.25064	15	60	14	25	9.10008	20.96	104	40	30	4.2633	73.74	140	35	20	18.4818	91.67	135
52M	WOLF		73	LAUZIERE	LA LECHERE	regulated shooting	Clermont-Ferrand	D7317004	42972	S 12 89 36	33.7	adult	25.55	133	133	0	1.80394	43.12	99	25	45	11.3892	18.83	62	37	5	4.74227	20.81	72	30	14	6.34109	10.44	56	16	32	5.1857	18.63	112	29	36	4.88265	71.17	144	37	18	17.0775	109.73	133
53ND	WOLF		73	NA	PONTAMAFREY MONTPASCAL	NA	Labo véto GAP	D7319015	43691	S 13 94 88		adult	19.72	115	120	0	1.54315	44.75	100	25	30	14.4761	14.56	100	15	20	8.53197	10.67	60	45	10	2.19995	14.64	55	20	30	5.94084	19.62	105	30	20	5.7736	61.67	145	40	20	13.5246	101.29	140
54M	WOLF		26	VERCORS HAUTS PLATEAUX	TRESCHENU CREYERS	natural death	OFB Gap	D2618002	43405	S 13 94 60		adult	35.96	86	86	0	3.92648	57.39	105	37.5	40	10.9478	23.67	60	18	42	9.14097	11.49	72	26	45	2.94402	14.66	63	15	30	7.93195	17.39	110	40	0	4.08435	100.16	170	50	30	16.1949	136.82	135
55M	WOLF		05	BEAUMONT VALGAUDEMAR	VILLAR LOUBIERE	NA	Labo véto GAP	D0519003	43527	S 13 98 95		adult	22.58	113	104	0	2.03879	43.08	91	21	25	17.362	18.16	60	30	24	5.17271	9.13	54	34	32	2.14547	11.92	71	12	28	8.21933	16.62	112	94	0	1.66107	64.22	126	43	50	8.96175	101.73	131
59M	WOLF		73	BELLECOTE	BELLENTRE	regulated shooting	Clermont-Ferrand	D7319009	43664	S 13 95 13	34	adult	23.82	73	73	0	3.06408	42.13	90	28	40	10.7636	16.19	52	18	38	6.62979	18.23	70	25	45	4.85781	10	50	12	48	5.2256	15.78	120	43	15	3.33017	69.44	140	37	26	15.7468	103.56	130
62F	WOLF		73	GALIBIER THABOR	VALLOIRE	regulated shooting	Clermont-Ferrand	D7317008	43063	S 12 89 38	25	adult	17.08	85	85	0	1.88691	31.15	80	25	38	9.16893	10.16	46	23	28	3.64833	11.21	52	32	10	3.25025	6.34	49	12	30	4.2879	10.52	110	52	10	1.87175	53.27	145	43	30	10.0154	76.3	130
63M	WOLF		73	LAUZIERE	LA LECHERE	regulated shooting	Clermont-Ferrand	D7318005	43335	S 13 56 43	30.3	adult	23.02	123	123	0	1.75745	40.38	96	23	40	12.5592	15.32	54	22	10	6.41477	20.99	79	32	6	6.14591	10.08	54	12	30	6.81736	11.83	108	48	10	2.28023	32.78	156	38	22	7.46646	94.67	128
66M	WOLF		73	ARVAN	ST COLOMBAN DES VILLARDS	regulated shooting	Clermont-Ferrand	D7316006	42871	S 12 69 05	19.2	subadult	11.43	76	76	0	1.41226	15.6	80	23	38	4.99111	7.15	38	14	25	4.32959	7.61	60	35	28	1.80868	5.77	52	15	38	2.84069	6.57	100	35	17	1.68646	24.67	140	28	20	7.72895	37.81	115
67M	WOLF		04	ISSOLE VERDON	MORIEZ	regulated shooting	OFB Gap	D0419002	43491	S 13 56 68		adult	26.96	120	120	0	2.1097	52.2	93	24	30	17.5897	14	55	16	50	5.26101	21.06	75	39	6	5.05961	10.54	56	10	40	7.56661	16.1	120	56	6	2.68618	82.41	148	48	30	13.8801	109.38	131
68F	WOLF		04	MONGES	SELONNET	regulated shooting	OFB Gap	D0418012	43394	S 13 56 76		adult	19.33	73	73	0	2.48651	38.54	98	32	42	8.35802	13.78	55	12	45	7.59532	14.77	92	38	10	3.60626	9.23	57	11	50	5.05456	11.96	110	38	25	2.67983	57.19	155	38	35	11.5087	83.9	115
69F	WOLF		05	CHABRIERES	ANCELLE	regulated shooting	OFB Gap	D0518012	43363	S 13 98 91		adult	24.84	112	112	0	2.08265	41.6	100	22	34	14.6391	15.72	84	23	21	5.96856	13.84	63	26	15	4.84413	8.81	49	15	34	4.56316	18.8	126	52	20	3.19171	73.71	154	53	27	11.5679	91.66	135
6M	WOLF		73	BEAUFORTAIN	BEAUFORT	regulated shooting	Clermont-Ferrand	D7317003	42913	S 13 67 93		adult	23.17	120	100	0	2.17574	46.58	90	25	20	16.3498	17.55	50	30	20	5.14203	11.15	45	30	20	3.2904	20	45	15	30	10.8212	15.61	125	40	30	3.1751	64.48	160	50	30	10.4258	115.4	145
70F	WOLF		73	BELLEDONNE NORD	CHAMPLAURENT	regulated shooting	Clermont-Ferrand	D7318009	43616	S 13 56 37	26.5	adult	18.64	105	95	0	1.84249	31.69	92	25	30	10.2514	13	56	22	27	4.92487	7.53	61	53	3	1.3367	13.74	60	9	45	10.1166	13.23	107	28	34	3.6801	40.62	116	45	25	7.63707	72.52	122
71M	WOLF		73	BEAUFORTAIN	LA LECHERE	regulated shooting	Clermont-Ferrand	D7318007	43349	S 13 56 48	36.3	adult	27.23	120	120	0	2.13083	49.3	92	28	36	13.3019	19.44	64	16	23	10.4615	23.73	76	35	6	6.35263	10.54	54	14	32	5.98328	19.43	124	52	8	3.47621	86.61	135	48	25	15.266	121.06	140
73F	WOLF		05	CHABRIERES	AVANCON	NA	Labo véto GAP	D0520015	44078	S 14 77 15		adult	20.15	110	110	0	1.72014	30.17	89	29	34	8.05416	18.8	69	13	18	12.8651	8.7	48	26	5	3.1405	8.05	49	9	30	7.25923	13.9	96	40	20	3.06778	50.28	125	39	20	11.3094	67.33	122
74F	WOLF		05	GUISANE	LE MONETIER LES BAINS	NA	Labo véto GAP	D0518005	43283	S 13 77 18		adult	18.68	110	110	0	1.59465	29.81	83	31	47	6.12424	9.58	53	30	11	2.93214	13.26	57	35	6	3.54976	6.86	46	11	33	4.9015	13.84	110	50	19	2.45878	51.93	143	47	21	9.62933	71.81	122
75M	WOLF		73	BEAUFORTAIN	LA LECHERE	regulated shooting	Clermont-Ferrand	D7316005	42672	S 12 69 20	31.6	adult	27.92	118	118	0	2.22185	48.75	90	29	41	11.8475	16.62	68	14	26	9.9806	20.59	76				10.51	56	15	25	5.95105	14.17	115	50	16	2.55932	81.92	148	44	36	14.0611	106.15	139
76M	WOLF		06	AUDIBERGUE	ESCRAGNOLLES	regulated shooting	ONCFS Gières - Grand Congel Bureau Louise	D0619008	43542	S 13 86 11	33	adult	27.81	92	92	0	2.83854	40.2	99	23	29	14.2753	22.95	83	18	15	11.5199	16.11	59	35	25	3.93018	8.95	50	15	33	4.68953
77F	WOLF		04	COULOMP DALUIS	CASTELLET LES SAUSSES	regulated shooting	OFB Gap	D0420014	44095	S 14 52 33		adult	18.31	115	115	0	1.49511	34	91	19	38	13.1682	12.33	67	24	21	4.48639	13.28	70	24	11	5.11732	8.71	56	10	44	5.87163	15.3	112	46	27	2.78418	52.13	133	40	36	9.84258	73.64	130
79M	WOLF		26	LA RAYE	OURCHES	regulated shooting	ONCFS Gières - Grand Congel Bureau Louise	D2620003	43930	S 14 49 38		adult	31.16	119	119	0	2.45885	53.91	99	43	10	11.5298	26.47	75	17	27	12.9771	17.75	64	36	50	2.98588	9.98	54	12	31	6.68069	20.95	116	55	21	3.34085	89.38	153	45	26	16.6652	117.64	137
80F	WOLF		04	MONGES	BAYONS	regulated shooting	OFB Gap	D0416005	42677	S inconnu		adult	9.72	82	82	0	1.1131	25.77	100	22	38	8.6197	10.12	48	18	35	4.3079	9.6	70	28	30	2.79739	8.57	50	12	30	5.79611	10.48	125	38	20	2.43471	44.16	105	38	38	8.54872	66.18	110
82ND	WOLF		73	GALIBIER THABOR	VALLOIRE	regulated shooting	Clermont-Ferrand	D7320013	44021	S 13 40 20		adult	14.39	120	125	0	1.08102	26.51	95	25	35	8.11153	15.7	70	20	15	7.09262	8.95	43	25	15	3.25789	9.6	50	15	20	5.63602	13.61	125	40	25	2.89706	47.36	130	45	15	9.49001	66.98	115
84F	WOLF		05	CHABRIERES	ANCELLE	regulated shooting	Clermont-Ferrand	D0520013	44093	S 13 51 17		adult	20.55	75	75	0	2.57296	33.78	86	33	48	6.39624	12.38	55	18	35	5.26994	8	55	46	10	1.61359	10.77	62	13	42	5.76969	12.36	95	27	35	3.52292	55.53	75	38	40	10.4501	81	73
86M	WOLF		04	ISSOLE VERDON	ANGLES	regulated shooting	OFB Gap	D0418009	43367	S 13 56 53		adult	26.33	129	129	0	1.91665	52.02	99	26	44	13.44	15.29	53	22	23	5.98417	21.09	79	39	6	5.06682	11.19	59	14	30	6.48693	12.18	120	60	13	1.85825	72.78	145	53	24	11.7109	104.28	138
87F	WOLF		05	BEAL TRAVERSIER	CEILLAC	regulated shooting	Clermont-Ferrand	D0520014	44097	S 14 77 28		adult	16.54	105	90	0	1.72574	32.65	100	17	30	15.5322	12.62	50	10	20	11.0927	5.95	45	30	25	1.69348	9.26	55	15	15	5.58818	13.16	110	40	25	2.80127	46.28	140	35	15	11.9232	67.36	125
90F	WOLF		06	BLEINE	GREOLIERES	regulated shooting	ONCFS Gières - Grand Congel Bureau Louise	D0619026	43605	S 13 86 17	19	adult	17.48	102	102	0	1.60925	28.37	86	25	27	9.4421	9.63	59	25	16	3.46355	10.02	74	24	40	3.01314	6.07	45	14	35	3.32837	9.79	107	51	5	1.79655	37.66	131	38	25	8.38486	63.04	121
91F	WOLF		26	LA RAYE	OURCHES	regulated shooting	ONCFS Gières - Grand Congel Bureau Louise	D2620002	43930	S 14 49 37	31.5	adult	25.66	74	74	0	3.25617	46.33	95	23	42.5	13.8686	14.63	55	18	25	6.89034	12.12	52	30	25	3.44958	8.77	52	12	20	6.43592	19.28	110	45	25	3.64799	59.62	135	43	35	10.6026	90.04	130
92F	WOLF		05	GUISANE	LE MONETIER	car crash	Labo véto GAP	D0518014	43406	S 13 51 48		subadult	10.87	115	115	0	0.887592	14.09	81	30	32	3.71945	7.04	44	24	25	2.48674	4.08	64	36	11	1.04813	3.32	42	14	27	1.98015	6.08	97	40	15	1.37934	21.91	105	38	30	4.66136	33.78	114
94M	WOLF		05	BARONNIES	ETOILE ST CYRICE	regulated shooting	OFB Gap	D0519002	43510	S 13 98 94		adult	32.26	110	110	0	2.75393	57.47	105	30	40	13.7038	16.91	52	15	35	8.63794	24.57	95	32	15	6.98728	13.41	70	15	35	6.86291	20.25	125	40	15	4.59401	76.57	150	46	42	11.5478	97.63	140
96F	WOLF		04	COUSSON	LA JAVIE	NA	Labo véto GAP	D0418013	43401	S 13 56 77		adult	21.6	114	114	0	1.77922	35.99	92	19	41	13.3499	11.04	48	13	31	6.80902	14.01	78	33	13	3.89724	8.3	46	15	30	4.4908	9.53	112	38	7	2.33853	46.4	145	39	20	10.4367	74.49	127
97F	WOLF		04	MONGES	LA JAVIE	NA	Labo véto GAP	D0418016	43431	S 13 77 02		adult	15.55	110	110	0	1.32745	37.33	88	32	34	9.03131	13.6	57	29	13	4.27423	17.92	74	32	22	4.89174	8.97	44	12	20	6.58269	8.44	126	65	7	1.21077	60.78	153	44	21	12.0388	77.89	132
99M	WOLF		05	FOURAN	CHATEAUROUX	regulated shooting	OFB Gap	D0519009	43589	S 13 99 03		adult	20.57	86	86	0	2.24604	36.98	98	30	32	9.76191	18.33	45	18	25	8.63294	18.8	78	38	28	4.11546	10.74	55	12	48	5.61229	15.8	115	38	25	3.54024	53.43	135	34.5	22	13.4047	88.25	125
9F	WOLF		73	GALIBIER THABOR	ST MARTIN DE LA PORTE	NA	OFB Gap	D7320001	43993	S 13 95 24		subadult	17.7	85	85	0	1.9554	20.9	78	25	38	6.15187	6.95	40	18	18	3.43488	7.1	58	20	30	2.89646	5.49	40	13	21	3.69477	7.37	100	28	28	2.18337	33.39	135	35	30	7.71263	51.73	120
Alaska_11b	WOlF_ALASKA											adult	32.93	12.5	125	0	2.47379	43.08	11.5	27	31	12.7716	24.32	6.25	20	13	11.0828	9.22	6.5	30	15	2.79681	7.48	6.5	10	20	6.58709	17.9	11	70	34	1.99165	61.18	9.25	40	30	12.3653	99.4	13.5
Alaska_1C	WOlF_ALASKA											adult	24.6	12.5	85	0	2.71768	51.33	10.7	30	30	13.8372	18.19	5.7	15	27	10.1068	10.89	7	30	20	3.21367	10.83	6	10	35	8.3138	23.62	11	50	30	3.84347	73.59	16	60	20	10.7591	95.45	15
Alaska_1D	WOlF_ALASKA											adult	27.05	11.5	95	0	2.67378	53.59	10.5	30	40	12.7786	23.94	7	30	30	6.46438	8.49	6.5	37	17	2.06734	8	5.8	10	40	5.74315	22.65	12	55	30	3.35058	76.59	15	45	40	12.1713	108.55	14
Alaska_1E	WOlF_ALASKA											adult	31.18	12	115	0	2.54601	27.21	9.5	30	25	7.67629	19.49	6.5	25	25	6.60908	8.3	6	30	25	2.36234	6.8	5.5	12	20	4.99022	18.69	12	50	30	3.04126	54.01	15.5	50	25	9.1391	83.84	14
Alaska_1F	WOlF_ALASKA											adult	19.02	11	100	0	1.78604	29.22	9	30	30	7.87695	11.44	5	15	20	6.70369	4.84	6	20	30	1.97449	7.1	5.5	15	20	4.1683	13.84	11.5	45	30	2.50229	48.25	15	40	25	10.2056	71.95	14.5
Alaska_1G	WOlF_ALASKA											adult	29.25	13.5	95	0	2.89124	48.07	11	27	20	15.623	24.03	5.5	25	10	8.85439	14.14	7	32	25	3.77298	11.31	6.2	10	25	9.60605	20.59	13	60	30	2.79202	85.49	17	85	17	8.97876	121.27	15
Alaska_1H	WOlF_ALASKA											adult	21.65	11	110	0	1.84819	29.25	9	30	16	8.75215	13.06	6.5	35	20	3.27985	8.27	6	25	25	2.82456	5.72	6.5	7	40	5.86622	14.98	11	50	30	2.43756	45.8	12.5	35	20	11.4791	64.99	12.5
Alaska_1I	WOlF_ALASKA											adult	29.43	13	125	0	2.21086	34.62	10	25	30	11.1992	14.49	5.7	15	20	8.49095	8.87	7	30	20	2.61756	5.45	6.5	10	20	4.79942	18.46	11.5	40	30	3.75479	42.64	13.5	30	30	11.4908	79.81	14
Alaska_1K	WOlF_ALASKA											adult	31.82	12	125	0	2.39041	49.21	11.5	25	25	16.6593	29.46	6	12	20	21.579	10.82	7.5	30	25	3.07958	8.98	6.5	7	35	9.84803	31.94	12.5	45	30	5.77479	76.94	15	40	25	16.2739	119.07	15
Alaska_1L	WOlF_ALASKA											adult	41.14	13	125	0	3.09055	73.42	11.5	30	30	19.7921	19.68	6	17	15	10.4596	17.4	8	30	25	4.95237	11.1	7	17	25	5.5457	39.29	13.5	60	30	5.32776	106.35	18.5	55	30	15.6325	169.76	16
Alaska_1M	WOlF_ALASKA											adult	35.55	13.5	110	0	3.03479	39.5	8	30	25	11.1435	22.81	7	15	20	13.3664	9.24	7	25	20	3.2721	11.17	6.5	12	20	8.19718	26.47	14	40	30	5.38404	50.44	15	35	25	12.1929	108.61	16
Alaska_4A	WOlF_ALASKA											adult	29.45	12	110	0	2.51405	39.2	10	35	25	9.47899	18.72	6	20	20	8.22725	7.64	7	25	20	2.70551	9.14	6.5	13	25	5.97152	20.63	11.5	65	30	2.58226	62.16	16	45	30	11.1674	86.56	14.5
Alaska_4B	WOlF_ALASKA											adult	24.91	11	110	0	2.12649	32.25	10	25	25	10.9178	15.79	6	15	20	9.25273	4.78	4.5	30	20	1.41059	8.01	4.5	10	30	6.50084	15.75	9.5	50	30	2.56286	55.46	14	40	35	10.6025	73.36	13.5
Alaska_AHR208-02	WOlF_ALASKA											adult	25.86	12.5	105	0	2.31271	41.18	10.5	25	35	12.6003	15.4	6	13	25	10.0426	8.11	7.5	28	20	2.56424	6.96	5.5	14	25	4.22244	21.23	11	60	30	2.87881	59.77	14.5	45	15	11.9767	86.6	14
N002	DOG	jack russel										adult	3.88	65	60	0	0.607243	5.57	55	20	15	2.5121	1.52	25	15	20	0.8907	2.63	35	35	0	0.707941	1.63	25	10	20	1.43542	1.82	75	20	20	0.803361	12.6	90	25	15	4.54462	15.38	80
N005	DOG	GOLDEN										adult	16	115	95	0	1.58153	12.72	90	20	30	5.14347	6.31	60	30	15	1.9004	8.76	45	45	0	1.83401	8.7	55	15	30	4.70723	5.59	85	60	0	0.875274	27.89	135	45	25	5.24367	48.36	90
N006	DOG	Yorkshire or Cain terrier										adult	2.73	55	55	0	0.466103	5	42	20	20	2.19379	1.15	20	7	15	1.48435	1.35	18	15	0	0.847914	0.92	23	12	15	0.693996	1.82	50	35	10	0.481103	10.26	80	40	15	2.31289	12.06	78
N007	DOG	BEAGLE										adult	5.97	76	76	0	0.737637	6.86	63	27	38	1.86965	4.72	35	28	22	1.46199	2.26	41	28	10	0.748878	1.61	35	12	32	1.06628	4.32	82	33	24	1.12353	13.64	101	27	22	4.3726	23.18	87
N008	DOG	BEAGLE										adult	9.59	87	89	0	1.01184	13.92	58	21	58	3.28018	2.75	26	8	28	2.83904	2.71	45	22	0	1.16053	1.73	36	9	28	1.59054	5.72	85	32.5	0	1.65347	22.66	90	30	42	5.24005	29.4	90
N009	DOG	BEAGLE										adult	6.46	75	75	0	0.808822	10.8	64	46	45	1.55031	2.9	30	11	28	2.17738	3.26	47	22	0	1.39606	1.224	32	9	32	1.08085	2.04	76	37	0	0.517979	12.12	97	30	35	3.08937	18.35	80
N010	DOG	BEAGLE										adult	7.37	82	70	0	0.98867	10.56	52	25	40	3.02167	2.87	28	8	42	2.49378	3.16	45	22	0	1.35324	2	32	10	45	1.32532	3.63	78	35	15	0.941165	17	100	30	33	4.43652	18.9	95
N011	DOG	parson										adult	10.06	68	68	0	1.38922	13.03	76	23	32	4.48648	6	44	18	18	2.96537	4.73	67	38	10	1.15488	2.6	43	11	33	1.85771	2.5	66	45	0	0.521928	26.28	115	35	40	5.36951	35.16	105
N012	DOG	BEAGLE										adult	13.7	71	71	0	1.81194	18.5	70	23	40	5.75395	4.66	30	10	25	3.95053	7.11	43	23	45	2.05938	2.12	42	7	35	2.32492	5.17	100	30	23	1.49032	26.4	115	32	40	5.89972	41.03	105
N-C10	DOG	BEAGLE										adult	8.8	77.39	62.53	0	1.32153	14.4	69.58	14.315	45	6.64239	4.6	37.14	5.81	50	4.76039	1.1	19.34	15.37	25	0.611088	3.7	29.18	8.46	45	2.89816	5.3	93.33	24.175	25	1.86667	20.2	100.25	29.375	32.5	5.4141	32.6	87.83
N-C11	DOG	COLLEY										old	6	85.66	74.32	0	0.758101	10.8	71.32	17.89	47.5	3.8086	2.4	30.39	9.505	35	1.93471	2.4	49.16	12.75	30	1.53582	1.6	28.69	16.395	27.5	0.81123	3.2	76.74	22.72	27.5	1.17369	12.8	105.6	24.925	20	4.50489	17.6	88.6
N-C12	DOG	BEAGLE										adult	7.5	84.44	77.3	0	0.911095	7.8	59.52	22.275	40	2.50495	5.1	41.7	16.16	35	2.41817	2.5	34.79	22.1	30	0.92297	1.9	31.5	11.7	20	1.43008	5.6	86.42	16.24	25	2.93603	19.4	111.94	31.45	25	5.21892	29.4	91.39
N-C13	DOG	BEAGLE										adult	11.1	92.89	71.58	0	1.45617	14.7	73.18	19.3	45	5.02937	2.3	25.4	24.85	30	0.749765	1.2	30.24	11.935	20	0.890131	1.9	22.45	11.94	50	0.958569	5.9	84.54	20.56	30	2.33476	20	108.74	47.265	27.5	3.50383	34.3	87.26
N-C14	DOG	SHEPHERD DOG										old	17	112.46	89.7	0	1.77966	15	78.85	27.33	37.5	4.06618	14.3	82.58	26.685	30	4.34103	5.8	84.34	30.655	27.5	1.58112	6.2	56.26	12.585	35	3.7819	8.4	127.9	30.48	25	2.34652	22.5	133.43	39.42	35	4.3647	47	138.72
N-C15	DOG	SHEPHERD DOG										old	13.4	101.36	74.03	0	1.69973	13.4	77.27	12.455	45	7.10419	8	72.85	19.27	40	2.97478	4.5	59.91	15.13	27.5	2.48549	5.3	46.27	11.74	22.5	3.90868	9	85.37	17.4667	30	4.19224	20.4	127.74	20.075	45	6.70785	32.9	108.12
N-C16	DOG	HUNTING DOG										old	9	100.85	71.73	0	1.17821	9.8	70.87	14.335	40	4.89047	6	67.82	15.34	35	2.99698	4.5	44.63	17.235	40	1.88436	2.8	39.37	9.05	35	2.37509	6	84.3	31.805	30	1.53486	21.9	118.14	27.2	32.5	6.33911	26.6	93.06
N-C17	DOG	BOXER										old	23.3	124.32	92.19	0	2.37331	21.3	87.16	25.26	45	5.56801	6.9	42.52	12.76	37.5	4.0129	5.3	68.55	35.81	35	1.14221	6.4	52.94	17.24	35	2.8498	12.9	93.86	38.95	25	2.81995	31.8	123.54	52.44	27.5	5.02131	45.9	113.09
N-C18	DOG	BELGIAN SHEPHERD										old	14.9	97.75	70.99	0	1.97093	19.4	71.76	18.785	55	5.53159	9.3	61.65	31.16	32.5	2.35455	5.4	58.33	13.485	27.5	3.34642	4.1	38.22	9.955	35	3.16165	9.6	99.1	30.695	20	2.76104	34.3	117.01	36.305	35	7.22463	50	116.36
N-C19	DOG	GOLDEN										adult	12.9	97.12	89.96	0	1.34655	14.2	61.39	15.015	50	5.67674	8.3	63.91	19.65	35	3.23648	3.9	60.56	19.1167	35	1.57444	3.7	51.72	11.785	30	2.54806	7.4	91.94	29.51	17.5	2.24681	39.9	123.04	27.285	32.5	11.5134	39.6	103.64
N-C2	DOG	BEAGLE										young	8.97	78.3	107.3	0	0.785009	13.3	61.3	16.7333	40	5.6858	3.57	25.7	12.0333	20	2.60772	2.12	27.4	15.6	35	1.04878	1.62	26.7	12.05	32.5	1.06258	6.32	92.8	20.15	30	2.55186	17.15	103.1	21.9	30	6.33103	29.4	94.5
N-C20	DOG	PAPILLON										adult	3.6	59.85	49.93	0	0.677053	1.6	35.26	13.2	37.5	0.89801	0.8	22.68	10.165	37.5	0.58404	0.3	23.62	6.08	27.5	0.41234	0.3	34.3	5.645	20	0.468004	0.5	37.21	12.975	17.5	0.345275	1.7	70.72	9.65	22.5	1.51936	3	56.25
N-C21	DOG	KING CHARLES										old	4.8	58.36	53.27	0	0.846136	7.7	56.53	13.06	45	3.89315	2.9	33.315	10.94	50	1.59383	0.8	18.44	8.29	30	0.787364	1	26.92	13.62	30	0.595882	2.2	73.86	24.22	25	0.773406	12.6	96.19	19.425	37.5	4.80396	16.9	90.12
N-C22	DOG											old	30.5	105.34	78.6	0	3.64384	26.7	69.7	29.12	35	7.01379	11	47.3	21.43	35	3.93304	10.2	66.24	35.38	30	2.35224	6.3	45.97	10.87	35	4.4492	13.3	126.5	55.65	20	2.10987	65.6	143.53	44.09	37.5	11.0193	70.4	128.81
N-C23	DOG											old	23.9	135.31	118.86	0	1.88818	21.5	78.84	30.61	50	4.2161	15.4	55.62	22.885	30	5.45122	10.4	52.96	33.54	25	2.64762	6.1	68.51	23.29	25	2.22455	8.4	104.51	19.29	35	3.35116	44	135.23	45.855	20	8.41735	58.3	123.96
N-C3	DOG	BEAGLE										adult	8	88.7	98.3	0	0.76422	11	60.9	15.4333	35	5.45213	3	19	9.9	2.5	2.83182	3	30.5	14.55	5	1.93514	5	31	13.85	27.5	3.00093	2	66.7	11.95	15	1.51876	22	106.2	28.2	45	5.1497	42	99.1
N-C4	DOG	BEAGLE										adult	8	89.3	166.1	0	0.452275	9	70.1	15.9333	35	4.32085	2	24.1	6	42.5	2.29881	2	20.6	10.4667	10	1.77289	2	37.3	13.05	60	0.718118	2	64.9	21.1	15	0.860151	18	118.3	28.95	40	4.44633	27	95.4
N-C5	DOG	FRENCH BULLDOG										adult	13.13	72	77.1	0	1.59916	15.18	70.5	17.2333	53.3333	4.91203	8.36	24.6	12.12	23.75	5.90562	6.6	41	11.75	37.5	4.19838	4.08	40.8	9.95	42.5	2.83318	3.09	75.2	24.8	15	1.13067	21.76	118.4	25.1667	22.5	7.45714	36.51	100
N-C6	DOG	BEAGLE										adult	6.75	75	75	0	0.845131	9.4	56.4	15.1	27.5	5.15642	2.81	27.5	9.26667	20	2.6654	0.88	26	9.3	10	0.877931	1.36	22.6	9.4	30	1.17422	2.45	78	14.85	0	1.54997	15.24	95.9	26.75	25	4.82015	20.84	75.6
N-C7	DOG	BEAGLE										adult	8.72	78.9	78.8	0	1.03914	12.34	59.7	17.2333	30	5.79089	3.22	43.9	9.6	20	2.94825	1.5	28.2	11.7	35	0.989416	1.31	27	10.25	45	0.846913	5.57	92.6	20.25	30	2.23792	15.46	93.1	20.9	40	5.28982	27.35	87.2
N-C8	DOG	BEAGLE										adult	10.81	83.7	74.7	0	1.3589	13.67	62.7	17.775	32.5	6.05699	5.26	29.4	13.1667	15	3.6095	1.88	30	13.4		1.32179	2.81	34.1	9.53333	42.5	2.03657	6.63	85.6	20.3	30	2.65725	23.31	99.3	33.4	35	5.33684	32.03	89.25
N-C9	DOG	SHEPHERD DOG										adult	6.8	71.79	62.51	0	1.02151	11.2	53.1	18.76	42.5	4.1104	3.1	26.7	15.935	30	1.57592	1.3	36.285	17.17	20	0.670298	3	29.63	9.14	40	2.35633	3.5	91.01	10.67	25	2.79295	17.2	94.85	28.03	22.5	5.2923	27	87.17
Ny-C1	DOG											adult	19.4	100.8	92.1	0	1.97799	26.7	90.2	23.8	35	8.58158	9.01	31.6	13.15	15	6.19065	7	46	16.45		4.00905	7.58	56.7	10.5	35	5.5418	12.83	108.4	31.1	25	3.51257	38.9	121.5	33.3667	25	9.86362	60.1	105.8
Ny-C10	DOG	GERMAN SHEPHERD										old	15.8	98	75	0	1.97823	23.3	62	33	35	5.40101	6.3	54	19.5	32.5	2.54876	5.4	46	24	12.5	2.06954	6.2	49	10.5	27.5	4.90838	8.4	99	42	10	1.8504	57.5	121	38.5	27.5	12.3669	28.1	75
Ny-C11	DOG	MASTIFF										old	22.1	103	94	0	2.20773	24	87	30	42.5	5.50794	10.6	60	10	35	8.12201	8	62	29	15	2.51041	7.5	57	17	40	3.16718	9.8	114	44	30	1.81212	43.6	140	53	37.5	6.09258	39.4	109
Ny-C12	DOG	FOX TERRIER										adult	19.6	99	96	0	1.9172	19.5	77	24	47.5	5.12596	8.7	54	13.5	37.5	4.78239	6.3	67	42.5	30	1.20946	5.1	49	10.5	35	3.72865	8.7	91	34	27.5	2.13232	36.8	120	32	37.5	8.51703	50.6	112
Ny-C13	DOG	HUSKY										adult	16.49	90	60	0	2.58078	21.6	80	25	40	6.18068	6.7	35	10	45	4.43152	5.75	45	20	45	1.91528	5.1	40	10	35	3.91509	7.24	97.5	15	40	3.47364	26.93	110	25	50	6.46379	51.3	120
Ny-C14	DOG	CANE CORSO										adult	32.8	100	60	5	5.11386	52	110	23	65	8.92262	37.5	65	25	35	11.4934	16.5	70	21	45	5.2343	10.37	55	10.15	32.5	8.07511	28.2	135	30	35	7.23396	89.61	160	40	41.6667	15.6227	131.8	150
Ny-C15	DOG	LEONBERGER										adult	33.1	110	88	0	3.53205	46.6	100	22	40	15.1525	19.3	50	15	37.5	9.5483	10.57	60	20	40	3.81424	9.28	55	10	42.5	6.41188	22.3	135	12.2	55	9.84963	77.9	145	42.5	37.5	13.575	95.3	140
Ny-C16	DOG	BULLDOG										old	13.97	90	70	0	1.87405	20.6	80	26	45	5.23175	7.02	40	16	35	3.36182	5.65	40	20	42.5	1.96227	4	40	10	52.5	2.28199	7.63	90	20	30	3.10391	29.34	130	25	50	7.04225	41.69	110
Ny-C17	DOG	BORDER COLLIE										old	11.27	75	52	0	2.03518	17.82	70	16.5	35	8.26146	5.26	40	15	30	2.84065	5.13	60	15	50	2.07111	3.18	40	8	35	3.05146	6.22	110	17	27.5	3.04898	26.4	125	29	35	6.96136	40.8	120
Ny-C18	DOG	ROTTWEILLER										adult	46.6	12	79	10	5.45497	55.7	105	30.6667	47.5	11.4588	13.27	47	20	37.5	4.92381	21.04	70	20.3	30	8.45648	9.05	52	12.13	47.5	4.72365	33.7	150	40	35	6.48363	95.7	165	40	42.5	16.4667	149.9	140
Ny-C19	DOG	CHIHUAHUA										adult	2.59	60	45	0	0.540467	4.11	42	8.66667	50	2.8466	1.8	36	11	35	1.25383	1.09	20	9	30	0.988152	0.94	22	4.5	40	1.4996	2.02	60	15	35	1.03635	5.53	86	15	30	2.98049	12.39	85
Ny-C20	DOG	PITBULL										old	33.2	105	72.5	0	4.30013	49.3	95	25	35	15.0848	15.1	70	11	22.5	11.863	14.95	70	18.5	35	6.23653	10.07	55	12	40	6.02433	13.85	110	25	25	4.71703	77.11	140	36	35	16.3793	104	120
Ny-C21	DOG	BOXER										old	23.4	115	92	0	2.38842	26.2	95	22	42.5	8.19932	8.25	35	11	35	5.74671	5.73	40	15	45	2.54482	3.57	35	12	32.5	2.35138	6.6	90	20	42.5	2.28575	50.84	120	46	30	8.93515	58.14	110
Ny-C22	DOG	SHETLAND SHEEPDOG										adult	23.3	110	79	0	2.76956	25.01	70	27.5	37.5	6.73777	6.44	40	20	30	2.60843	7.64	50	20	45	2.54482	6	50	15	32.5	3.16152	12.74	110	30	30	3.45511	52.3	125	45	37.5	8.60755	76.76	120
Ny-C23	DOG	BELGIAN SHEPHERD										old	10.04	90	72	0	1.30943	15.38	70	15	45	6.77047	3.45	30	10	37.5	2.56023	4.15	40	31	35	1.03314	3.22	35	15	25	1.82325	6.99	85	35	30	1.62489	21.7	75	35	40	4.43373	32.8	95
Ny-C24	DOG	DEERHOUND										old	7.11	70	70	0	0.953791	10.27	65	15	45	4.52098	2.47	30	16	25	1.30872	2.29	30	13	37.5	1.31664	1.64	25	7	30	1.90144	3.14	85	16	35	1.51028	14.17	80	21.5	30	5.32826	29.03	85
Ny-C25	DOG											adult	8.96	75	55	0	1.52977	9.02	60	12.5	40	5.16201	4.19	30	13	40	2.3095	3.55	40	15	30	1.93098	2.67	40	12	25	1.88978	6.04	80	17	37.5	2.64812	14.05	100	25	38.3333	4.11534	25.1	110
Ny-C26	DOG	DOBERMANN										old	7.49	70	63	0	1.11641	9.21	60	19.5	25	3.99732	3.7	40	7	20	4.64604	4.76	40	7.5	27.5	5.30376	2.3	30	10	27.5	1.91189	4	80	22	25	1.54809	16.3	90	18	37.5	6.70665	26.2	100
Ny-C27	DOG	BORDER COLLIE										adult	10.69	80	66	0	1.52095	9.63	60	14.5	42.5	4.57254	5.62	35	12	30	3.79384	3.93	50	13	40	2.18179	2.72	30	7	42.5	2.68478	4.79	90	25	35	1.4745	22.45	105	26	40	6.17477	33.66	80
Ny-C28	DOG	ROTTWEILLER										adult	47.7	110	90	0	4.97689	62.1	110	26.5	32.5	18.4562	24.8	80	22.5	35	8.44553	16.03	60	17	40	6.80531	9.42	55	11	42.5	5.91692	22.96	130	30	27.5	6.37768	118.4	175	40	35	22.635	145.1	140
Ny-C3	DOG	DACHSHUND										adult	6.68	56.4	56	0	1.12013	9.55	60	11.6667	45	5.40518	2.2	27.5	9.4	35	1.7933	2.24	29.8	9.4	35	1.83905	2	27	7.4	35	2.07477	2.26	60.6	17.4	35	0.999556	16.17	77.1	15.6	50	6.2198	21.69	87.4
Ny-C4	DOG	MASTIFF										adult	26.7	113	73	0	3.43455	29.7	84	26.5	40	8.01739	8.9	59	12.5	37.5	5.28372	12.6	84	15.5	32.5	6.45918	6.7	54	15	35	3.4289	12.4	103	44.5	27.5	2.32206	51.6	141	43	37.5	8.88733	72.8	126
Ny-C5	DOG	BEAGLE										old	16.7	101	75	0	2.09092	25	81	26	47.5	6.06622	7.1	46	20	35	2.72011	5	56	30	27.5	1.39279	4.9	49	10.5	37.5	3.4696	8.4	79	31.5	20	2.35417	37.4	129	44.5	35	6.42687	63.2	114
Ny-C6	DOG	SHEPHERD DOG										old	21.4	112	92	0	2.18428	27.4	92	29.5	35	7.10496	10.8	47	18	27.5	4.97821	11.9	75	34	35	2.70111	6.7	56	11.5	30	4.7284	8.8	116	44	27.5	1.66664	40.9	119	37.5	47.5	6.87858	71.1	124
Ny-C8	DOG	AMSTAFF										adult	35.1	115	101	0	3.26338	55.8	106	31.5	52.5	10.0702	17.1	55	22.5	42.5	5.24128	15.9	90	21.5	37.5	5.52757	8.6	53	16.5	37.5	3.87514	17.2	115	59	20	2.57363	72.7	143	50.5	35	11.0086	117	144
ST002	DOG	STREET DOGS										young	13.78	90	89	0	1.45392	17.64	80	26	30	5.48687	4.78	32	22	20	1.90978	5.22	35	23	15	2.06536	3.93	48	10	15	3.55748	8.97	107	54	20	1.46645	36.36	130	42	35	6.62007	42.39	108
ST003	DOG	STREET DOGS										young	15.15	82	85	0	1.67369	22.48	80	27	30	6.73336	5.59	35	13	36	3.25401	7.33	40	27	30	2.21503	5.07	45	12	40	3.0331	8.58	100	38	25	1.92248	48.17	125	43	48	6.9975	50.2	110
ST013	DOG	ROTTWEILLER										adult	23.97	115	115	0	1.95728	33.12	110	33	31	8.0336	12.62	52	17	32	5.88876	7.06	53	32		2.07857	8.78	55	18	35	3.74449	15.78	135	22	40	5.16204	40.9	183	52	33	6.15793	94.03	142
ST017	DOG	STREET DOGS										adult	15.93	77	77	0	1.9427	20.09	75	20	48	6.27667	5.33	38	22	25	2.05387	5.21	42	25	0	1.96339	5.84	46	13	48	2.817	10	93	45	0	2.08771	33.82	130	40	20	7.41691	44.42	115
ST018	DOG	STREET DOGS										adult	18.92	82	82	0	2.16665	22.94	75	18	40	9.11682	6.94	45	17	30	3.307	5.96	43	23	30	2.11426	4.6	46	7	42	4.57657	8.81	105	32	25	2.34415	40.6	126	30	42.5	9.31449	46.48	110
ST019	DOG	STREET DOGS										adult	15.76	84	84	0	1.76181	18	70	22	35	6.25868	7.11	35	16	23	3.82621	3.19	38	20	0	1.50269	5	42	18	21	2.43028	8.5	90	40	20	1.87598	46.27	120	35	25	11.1849	46.69	90
ST021	DOG	STREET DOGS										adult	21.22	85	85	0	2.34427	29.1	75	28	46	6.74178	10.11	45	12	35	6.45547	10.24	58	43	0	2.24358	7.79	55	10	41	5.50965	11.9	100	33	10	3.33632	53.47	145	40	26	11.2159	67.43	110
ST022	DOG	STREET DOGS										adult	18.33	85	85	0	2.025	21.16	65	20	45	6.98617	10	35	15	40	4.77701	8.28	20	20	0	3.9004	4.96	45	5	45	6.5736	7.21	100	15	30	3.91073	39.56	60	30	45	8.7045	56.78	65
ST024	DOG	STREET DOGS										adult	13.94	85	85	0	1.54002	14.93	70	25	40	4.27211	4.44	40	15	40	2.12099	5.57	26	20	45	1.85532	3.94	39	5	45	5.22177	6.08	73	15	20	3.57834	28.93	55	25	20	10.1512	38.23	99
ST025	DOG	STREET DOGS										young	12.61	88	88	10	1.32515	17.8	78	17	40	7.4902	5.66	34	5	30	9.17002	6.75	58	20	40	2.43577	3.53	40	18	35	1.50547	6.66	86	30	30	1.80621	34.2	98	20	30	13.8245	42.09	95
ST026	DOG	STREET DOGS										young	10.03	70	50	7.5	1.86759	11.38	74	15	40	5.42717	4.64	55	8	30	4.69842	3.62	50	8	25	3.8637	3.42	30	10	35	2.62541	5.62	80	30	30	1.52416	26.56	110	24	20	9.70792	27.19	90
ST027	DOG	STREET DOGS										adult	28.62	107	107	0	2.5117	36.43	95	26	42	9.72361	11.75	50	23	25	4.33091	11.29	60	35	0	3.03903	8.23	58	15	28	4.53994	12.19	115	57.5	0	1.99168	62.81	145	38	30	13.3629	75.11	130
ST028	DOG	STREET DOGS										adult	13.75	75	75	0	1.72156	17.85	78	25	46	4.63167	3.45	28	8	45	2.85238	4.82	34	20	40	1.73932	4.28	30	8	40	3.84073	7.67	90	20	35	2.9513	31.11	110	25	20	10.9161	44.2	80
ST029	DOG	STREET DOGS										adult	20.17	85	75	10	2.48701	25.66	95	26	45	6.51684	7.47	50	8	45	6.17602	8.92	55	40	0	2.10094	5	43	8	38	4.6155	9.68	35	30	0	3.03136	47.43	110	20	20	20.8033	57.25	100
ST030	DOG	STREET DOGS										adult	14.67	84	84	0	1.63996	16.09	70	17	35	7.24003	6.09	35	10	35	4.66633	4.88	40	40	0	1.14939	3.32	35	8	45	2.75004	8.09	95	30	0	2.53344	33.72	130	25	20	11.832	44.29	110
ST031	DOG	STREET DOGS										adult	14.51	92	79	0	1.72473	14.86	76	26	35	4.37198	4.89	40	17	15	2.59894	8.26	80	35	32.5	1.87521	4.77	45	12	45	2.63408	6.54	95	50	0	1.22883	33.47	130	45	23	6.39135	28.76	105
ST032	DOG	STREET DOGS										adult	18	93	93	0	1.81749	19.81	76	23	35	6.58855	3.67	38	14	30	2.12355	6	50	26	30	1.88286	4.21	41	10	37	3.15092	5.57	72	34.5	0	1.51677	38.91	125	45	30	6.99042	39.66	90
ST033	DOG	STREET DOGS										adult	9.63	75	75	0	1.20572	12.34	75	25	28	4.06985	4.14	51	10	20	3.63898	3.42	38	30	15	1.03743	2.96	45	7	45	2.80211	5.49	90	15	43	2.51473	19.41	90	20	35	7.42136	27.52	122
ST037	DOG	STREET DOGS										adult	21	100	100	0	1.97197	26.23	84	19	44	9.27358	8.08	50	8	40	7.23717	9.38	50	30	35	2.41299	6.9	40	7	45	6.53195	9.77	88	22	35	3.41759	50.52	130	26	36	14.6748	56	115
ST038	DOG	STREET DOGS										young	10.45	57	57	0	1.72156	11.72	55	21	33	4.37087	5.23	40	13	30	3.25898	4.45	55	20	25	1.89983	3.7	41	15	26	2.07767	3.35	80	28.5	0	1.10429	25.33	116	30	33	6.61042	28.66	110
ST039	DOG	STREET DOGS										adult	14.47	100	100	0	1.35878	16.86	60	20	40	6.03045	7.67	50	24	20	2.80907	7.25	45	40	0	1.7076	5.52	40	8	45	4.57236	5.89	110	20	15	2.67247	35.58	130	35	30	8.21849	58.81	115
ST046	DOG	STREET DOGS										adult	14.9		61	11	2.25157	20.94		15	21	12.1704	7.27		7	24	8.87483	6.1		15	14	3.71751	4.08		9	24	3.8811	6.65		20	18	2.97085	36.47		26	14	12.7055	49.21
ST047	DOG	STREET DOGS										adult	22.63		64	7	3.29562	29.92		24	22	10.7941	7.52		8	26	7.90281	9.9		17	28	4.84429	5.82		10	27	4.85971	7.05		22	19	2.84656	50.69		30	15	15.2359	50.1
[truncated: 13 more columns]

## Sheet: abbrevietaions
Abbreviations
DIGpds	mass of the digastric muscle
DIGlg	length of the digastric muscle
DIGlgfibre	fiber length of the digastric muscle
DIGangle	pennation angle of the digastric muscle
DIGpcsa	PCSA of the digastric muscle
MASSUPpds	mass of the Masseter pars superficialis
MASSUPlg	length of the Masseter pars superficialis
MASSUPlgfibre	fiber length of the Masseter pars superficialis
MASSUPangle	pennation angle of theMasseter pars superficialis
MASSUPpcsa	PCSA of the Masseter pars superficialis
MASPROFpds	mass of the Masseter pars profunda
MASPROFlg	length of the Masseter pars profunda
MASPROFlgfibre	fiber length of the Masseter pars profunda
MASPROFangle	pennation angle of theMasseter pars profunda
MASPROFpcsa	PCSA of the Masseter pars profunda
ZYGANTpds	mass of the Masseter pars zygomaticomandibularis anterior
ZYGANTlg	length of the Masseter pars zygomaticomandibularis anterior
ZYGANTlgfibre	fiber length of the Masseter pars zygomaticomandibularis anterior
ZYGANTangle	pennation angle of the Masseter pars zygomaticomandibularis anterior
ZYGANTpcsa	PCSA of the Masseter pars zygomaticomandibularis anterior
ZYGPOSTpds	mass of the Masseter pars zygomaticomandibularis posterior
ZYGPOSTlg	length of the Masseter pars zygomaticomandibularis posterior
ZYGPOSTlgfibre	fiber length of the Masseter pars zygomaticomandibularis posterior
ZYGPOSTangle	pennation angle of the Masseter pars zygomaticomandibularis posterior
ZYGPOSTpcsa	PCSA of the Masseter pars zygomaticomandibularis posterior
SPZYGpds	mass of the Temporalis pars suprazygomatica
SPZYGlg	length of the Temporalis pars suprazygomatica
SPZYGlgfibre	fiber length of the Temporalis pars suprazygomatica
SPZYGangle	pennation angle of the Temporalis pars suprazygomatica
SPZYGpcsa	PCSA of the Temporalis pars suprazygomatica
TPSUPpds	mass of the Temporalis pars superficialis
TPSUPlg	length of the Temporalis pars superficialis
TPSUPlgfibre	fiber length of the Temporalis pars superficialis
TPSUPangle	pennation angle of the Temporalis pars superficialis
TPSUPpcsa	PCSA of the Temporalis pars superficialis
TPPROFpds	mass of the Temporalis pars profunda
TPPROFlg	length of the Temporalis pars profunda
TPPROFlgfibre	fiber length of the Temporalis pars profunda
TPPROFangle	pennation angle of the Temporalis pars profunda
TPPROFpcsa	PCSA of the Temporalis pars profunda
PTEMEDpds	mass of the Pterygoideus medialis
PTEMEDlg	length of the Pterygoideus medialis
PTEMEDlgfibre	fiber length of the Pterygoideus medialis
PTEMEDangle	pennation angle of the Pterygoideus medialis
PTEMEDpcsa	PCSA of the Pterygoideus medialis
PTELATpds	mass of the Pterygoideus lateralis
PTELATlg	length of the Pterygoideus lateralis
PTELATlgfibre	fiber length of the Pterygoideus lateralis
PTELATangle	pennation angle of the Pterygoideus lateralis
PTELATpcsa	PCSA of the Pterygoideus lateralis
M	male
F	female
